# Supplementary material for: Orange-peel derived carbon-loaded low content ruthenium nanoparticles as ultra-high performance alkaline water HER electrocatalysts
Source: Royal Society of Chemistry journal article supplement (doi:10.1039/d3dt02969g), 2023-01-01
Supplement: d3dt02969g1.pdf [file d3dt02969g1.pdf]

*Supporting information*

**Orange-peel derived carbon loaded low content ruthenium nanoparticles as ultra-high performance alkaline water HER electrocatalysts**

Yang Teng, Lu Zhou, Yi-Zhi Chen, Jun-Zhe Gan, Ye Xi, Hai-Lang Jia\*

School of Chemistry and Chemical Engineering, Institute of Advanced Functional Materials for Energy, Analysis and Testing Center of Jiangsu University of Technology, Jiangsu University of Technology, Changzhou 213001, P. R. China.

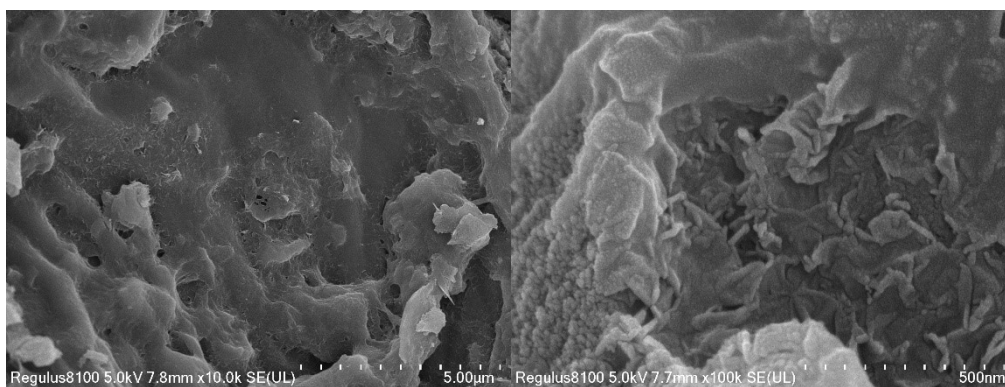

**Fig. S1** SEM of OPC

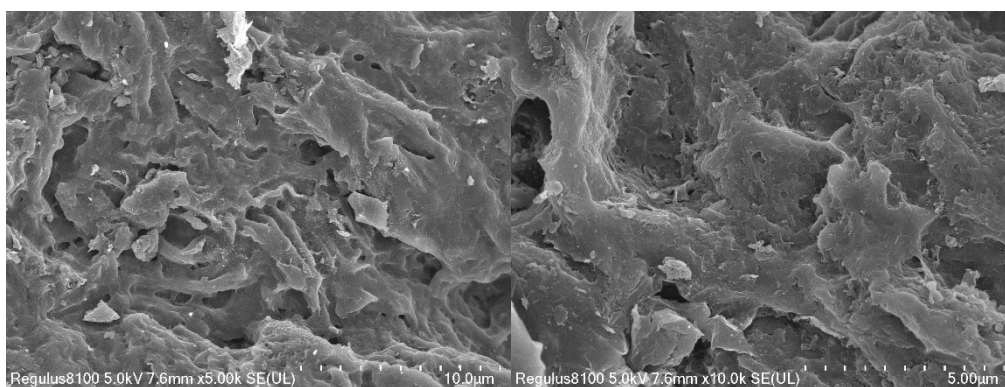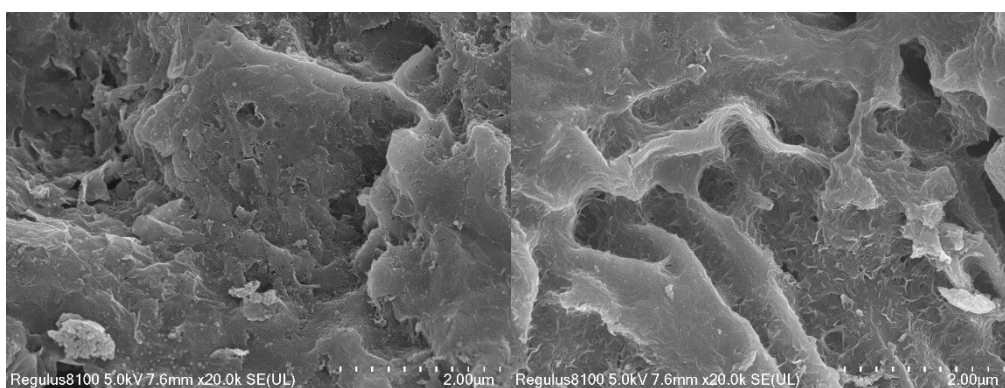

**Fig. S2** SEM of Ru/OPC

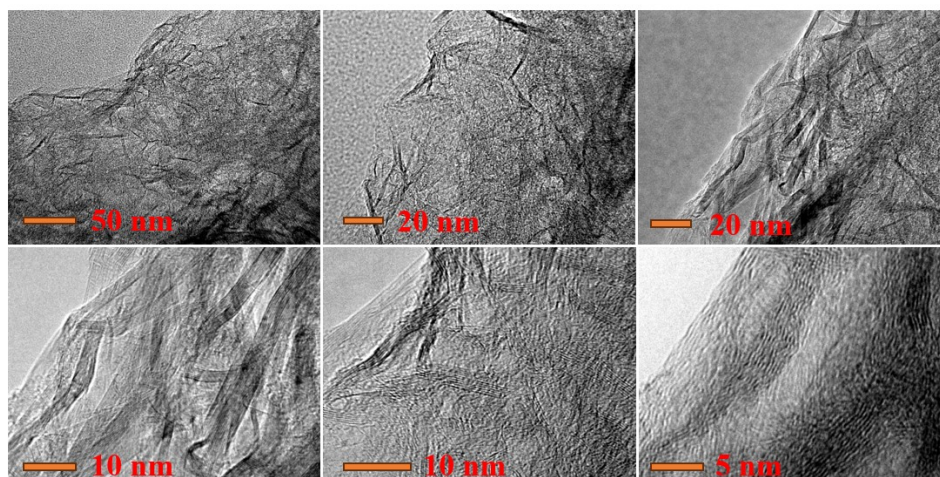

Fig. S3 TEM of OPC

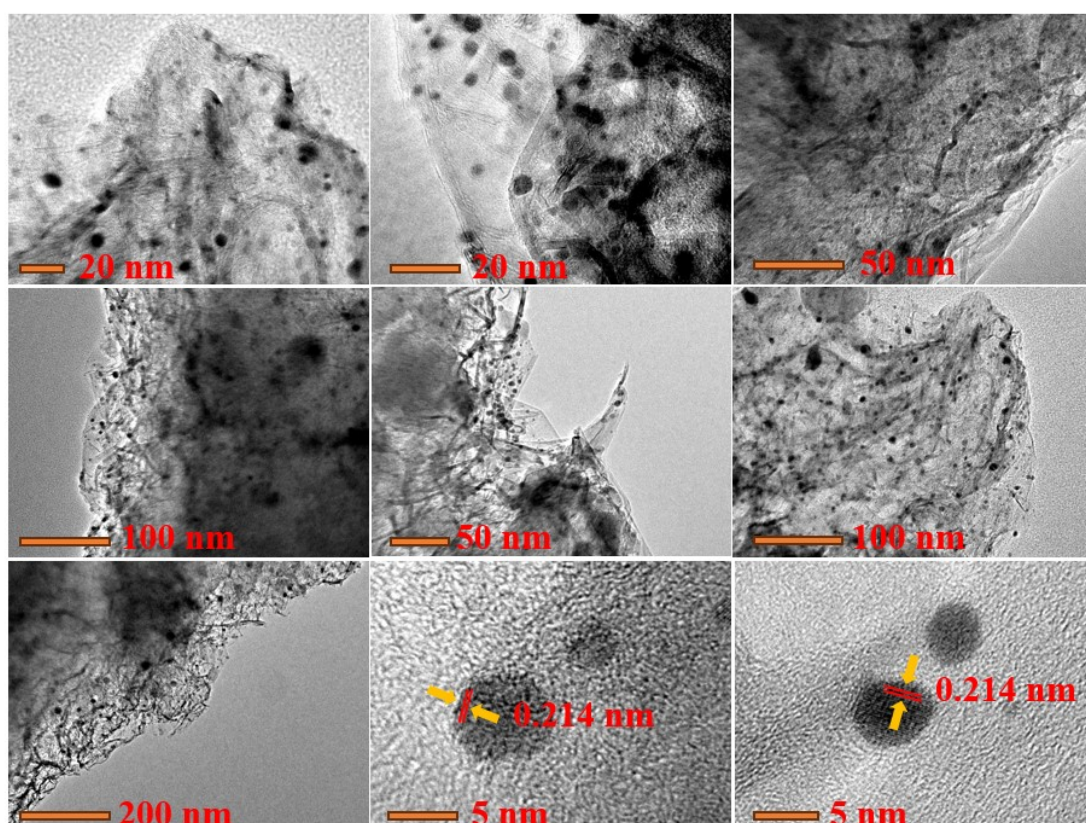

Fig. S4 TEM of Ru/OPC

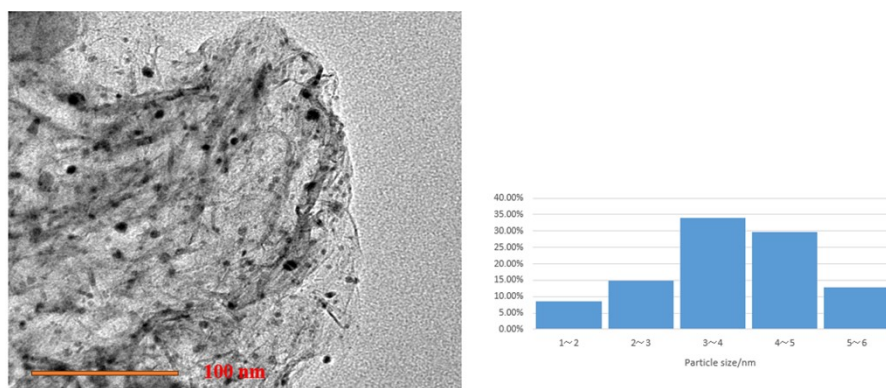

**Fig. S5** Particle size distribution of Ru/OPC

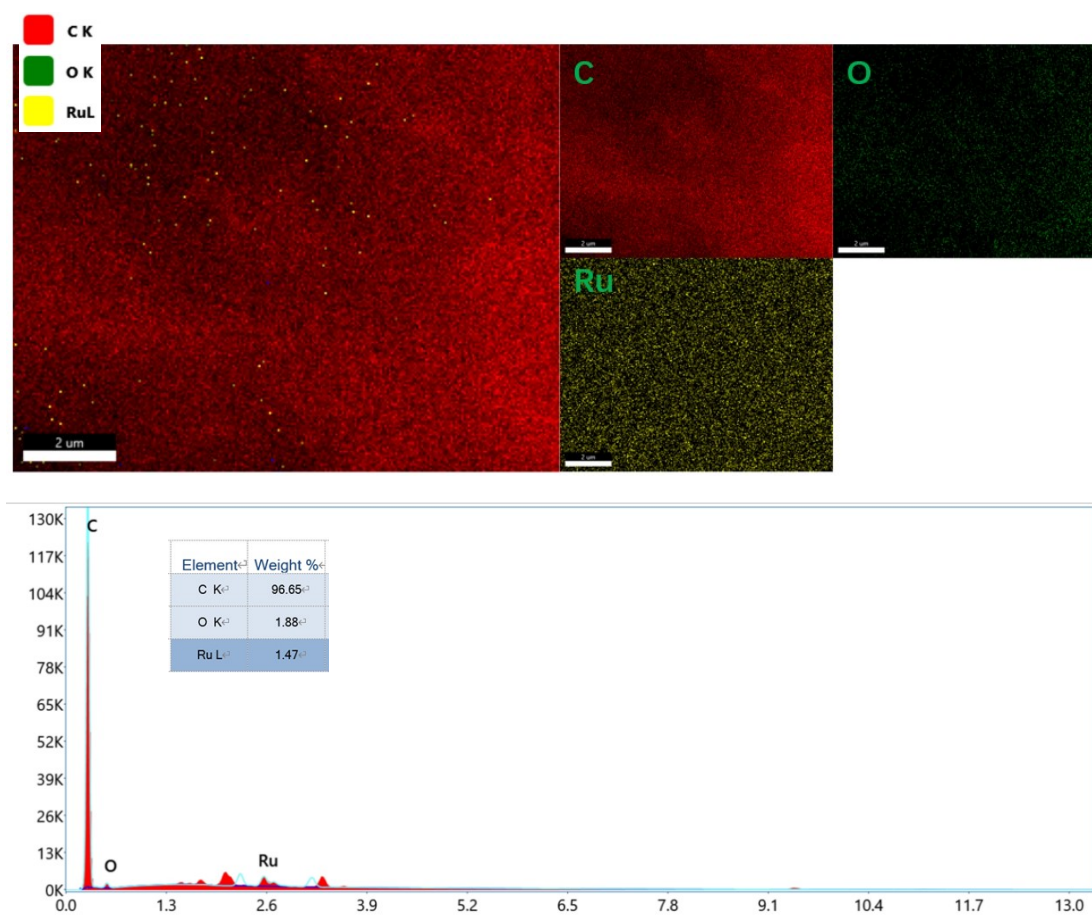

**Fig. S6** SEM-EDS mapping of Ru/OPC

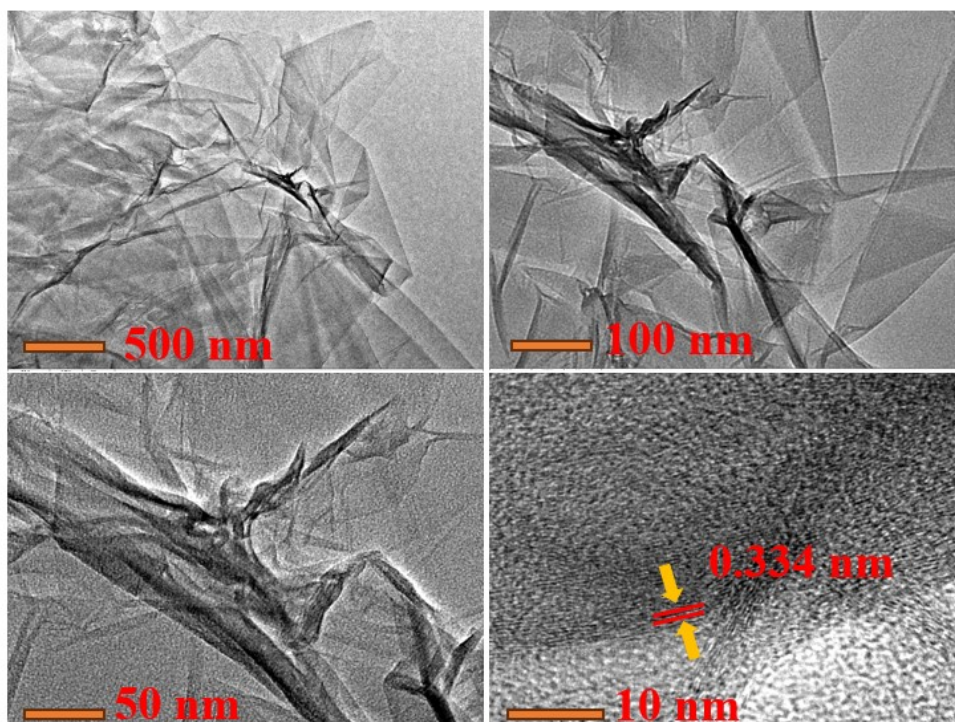

Fig. S7 TEM of rGO

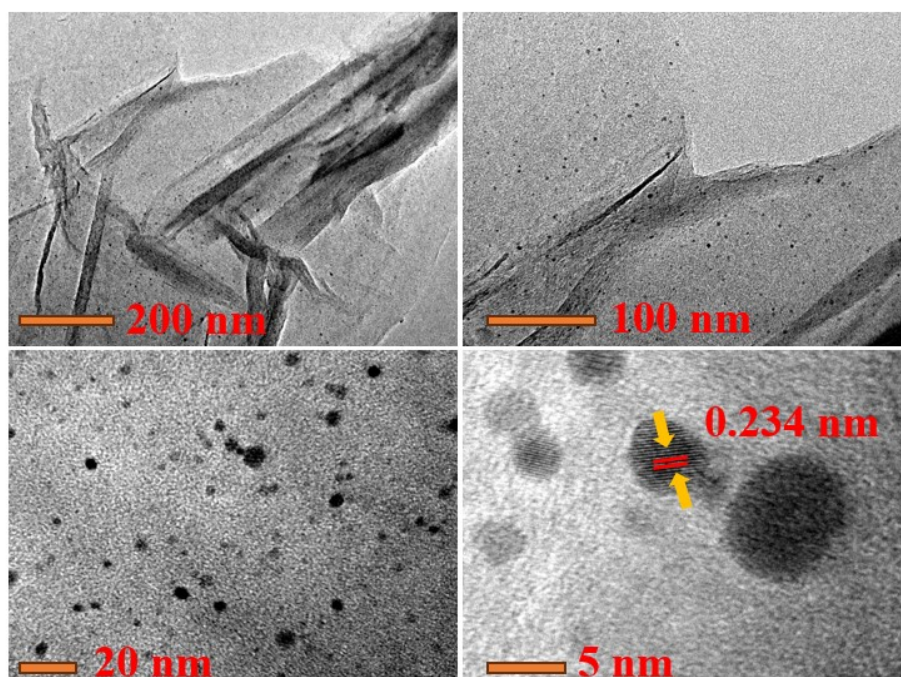

Fig. S8 TEM of Ru/rGO

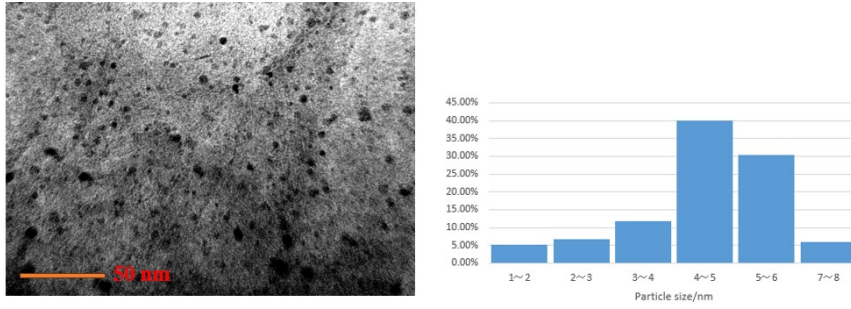

**Fig. S9** Particle size distribution of Ru/rGO

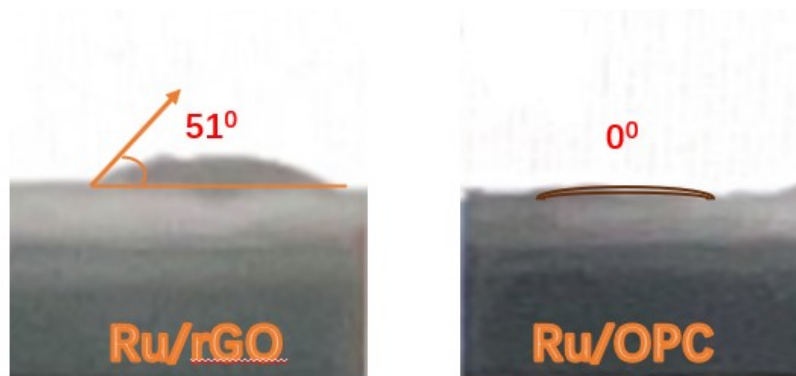

**Fig. S10** Contact angle of Ru/rGO and Ru/OPC

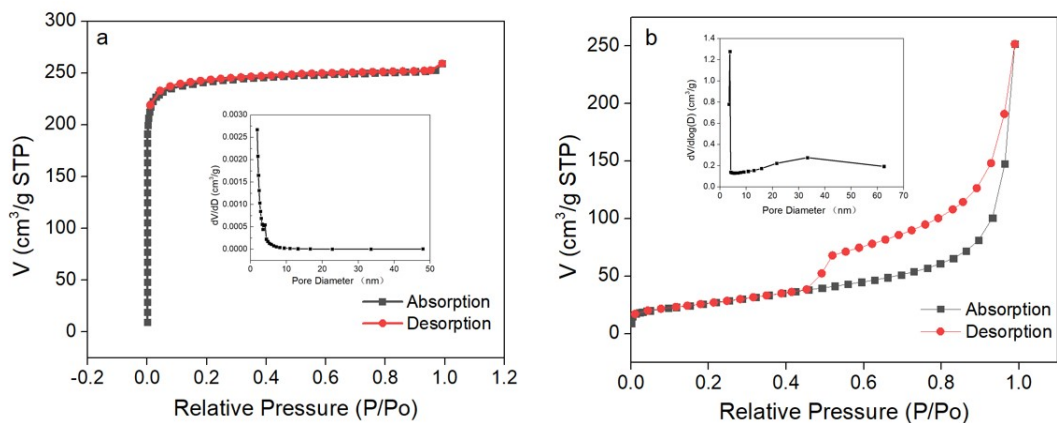

**Fig. S11** (a) N<sub>2</sub> adsorption-desorption isotherms and the pore size distribution of Ru/OPC, (b) N<sub>2</sub> adsorption-desorption isotherms and the pore size distribution of Ru/rGO.

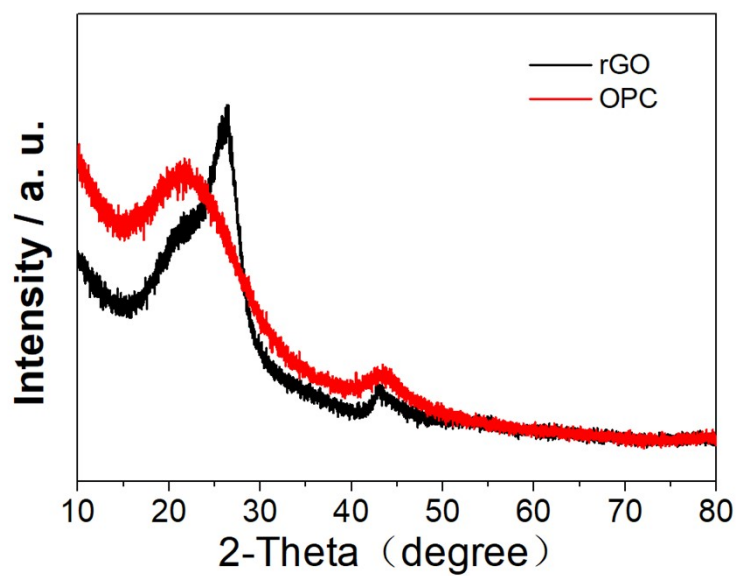

**Fig. S12** XRD of rGO and OPC

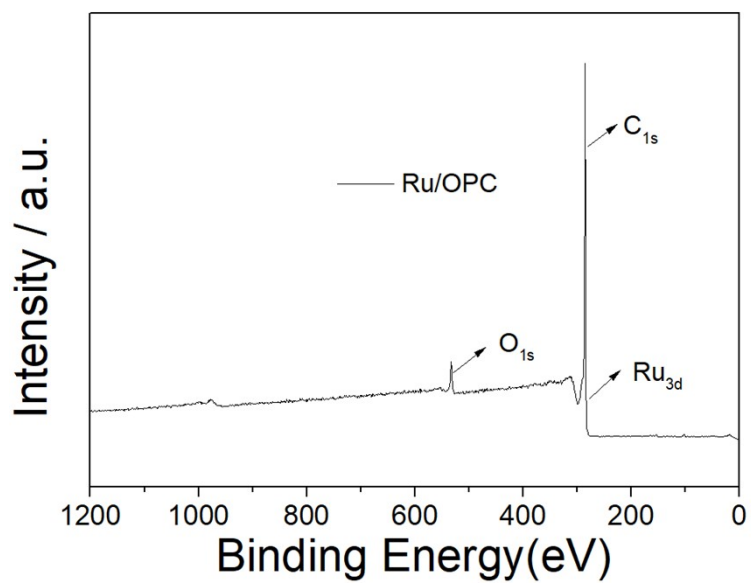

**Fig. S13** XPS survey spectra of Ru/OPC

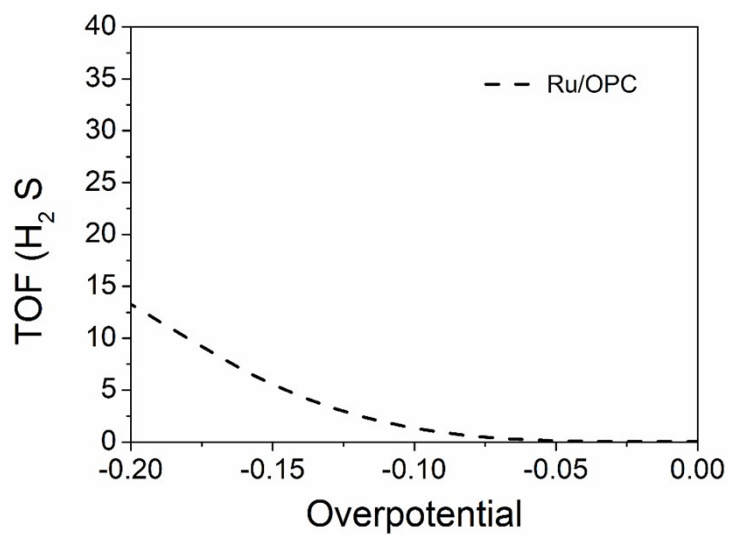

**Fig. S14** TOF of Ru/OPC in 0.5 M H<sub>2</sub>SO<sub>4</sub>



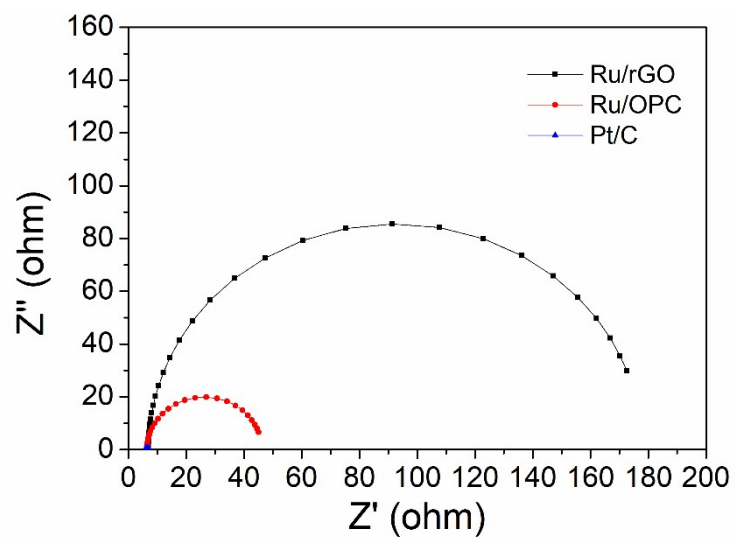

**Fig. S15** EIS of Ru/OPC in 0.5 M H<sub>2</sub>SO<sub>4</sub>

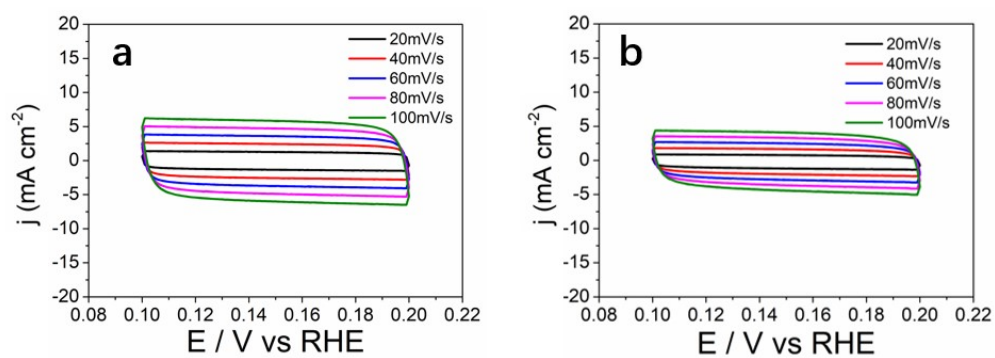

**Fig. S16** CV curves of Ru/rGO (a) in 1 M KOH, (b) in 0.5 M H<sub>2</sub>SO<sub>4</sub>

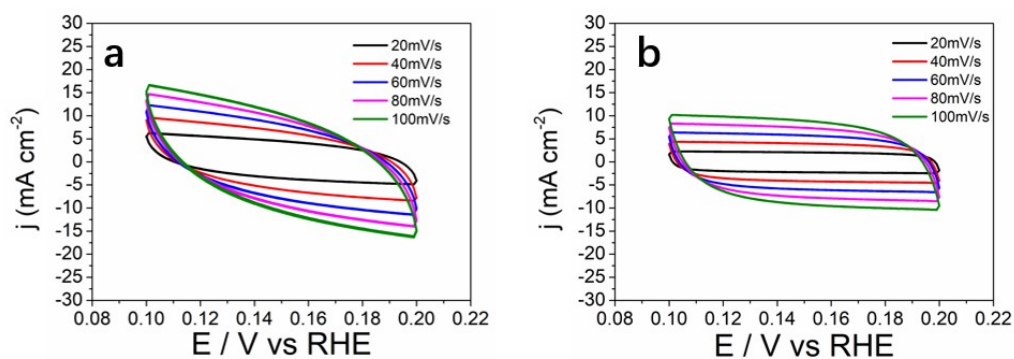

**Fig. S17** CV curves of Ru/OPC (a) in 1 M KOH, (b) in 0.5 M H<sub>2</sub>SO<sub>4</sub>

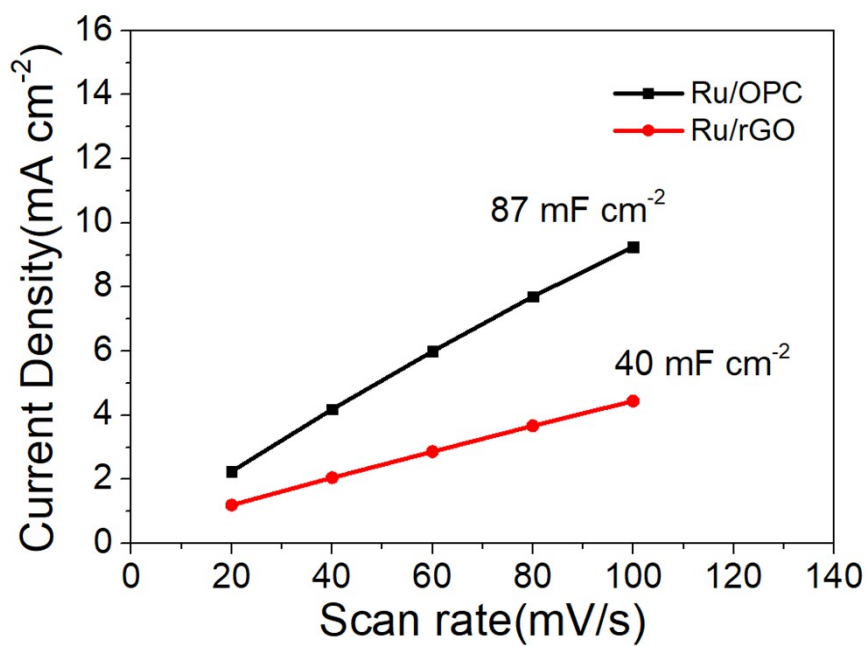

**Fig. S18** The linear slope of Ru/rGO and Ru/OPC, equivalent to twice the double-layer capacitance ( $C_{dl}$ ) in 0.5 M H<sub>2</sub>SO<sub>4</sub>.

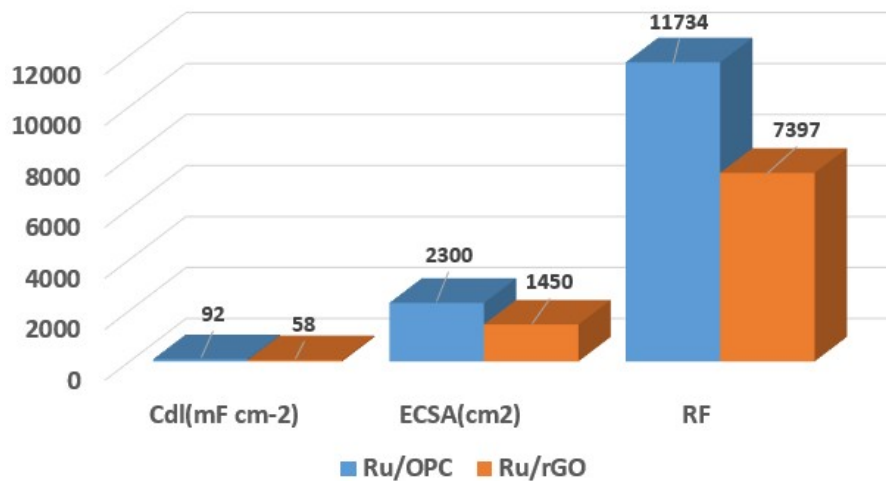

**Fig. S19**  $C_{dl}$ , ECSA, RF of the Ru/OPC and Ru/rGO in 1 M KOH.

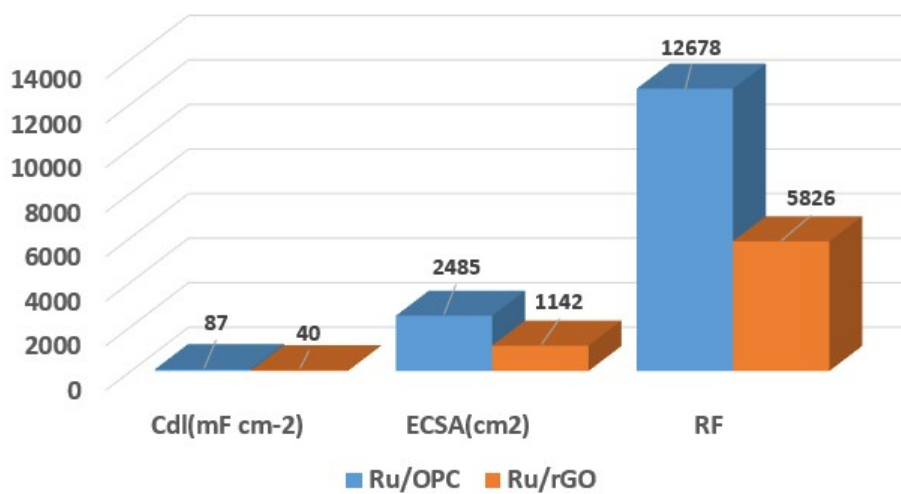

**Fig. S20**  $C_{dl}$ , ECSA, RF of the Ru/OPC and Ru/rGO in 0.5 M H<sub>2</sub>SO<sub>4</sub>.

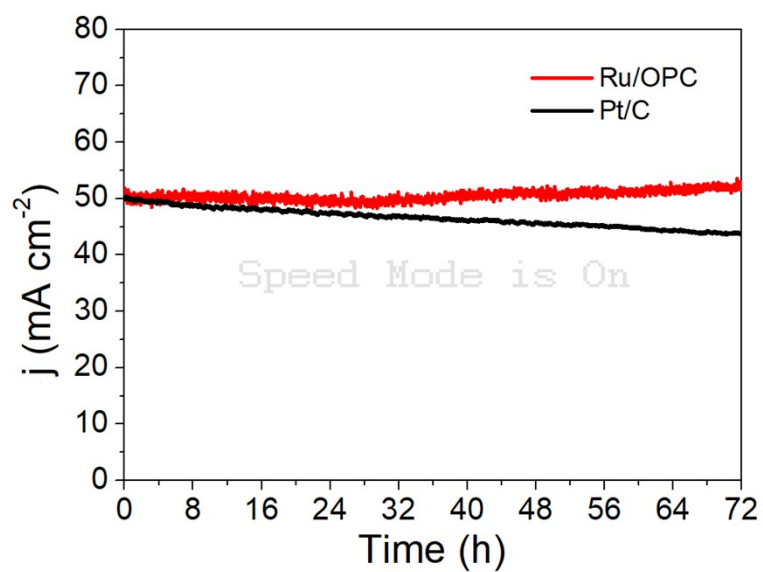

Fig. S21 Long-term i-t response test for Ru/OPC and Pt/C in 0.5 M H<sub>2</sub>SO<sub>4</sub>.

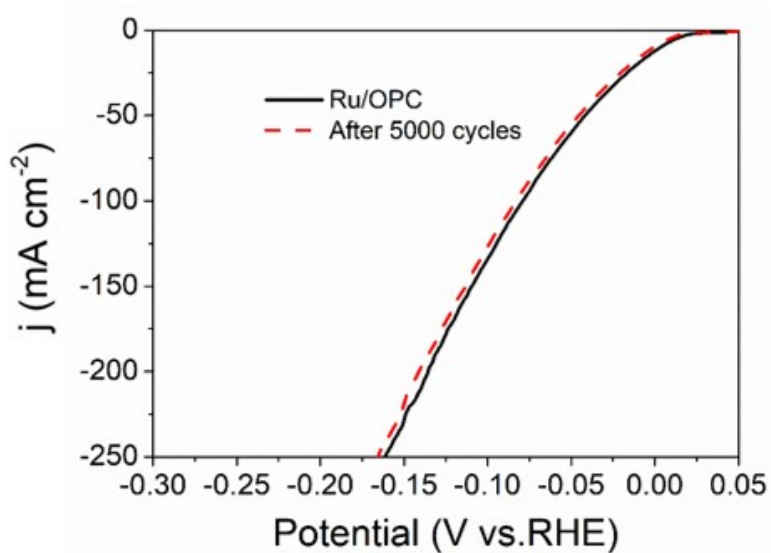

Fig. S22 LSVs of Ru/OPC catalysts before and after 5000 CV cycles in 1 M KOH

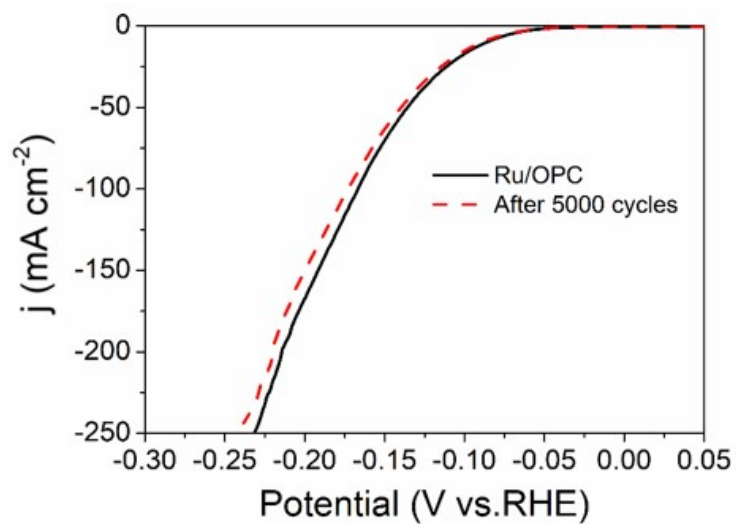

**Fig. S23** LSVs of Ru/OPC catalysts before and after 5000 CV cycles in 0.5 M H<sub>2</sub>SO<sub>4</sub>

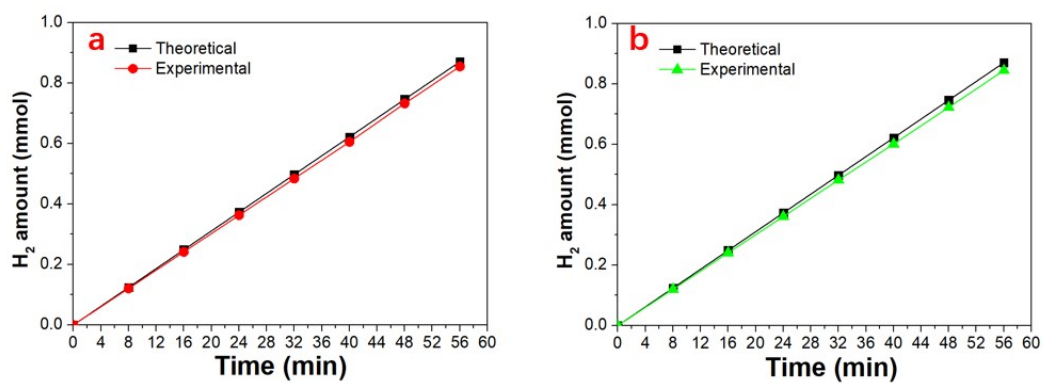

**Fig. S24** Faradaic efficiency of Ru/OPC in 1 M KOH (a) and 0.5 M H<sub>2</sub>SO<sub>4</sub> (b).

**Table S1.** Summary of HER catalytic activities of Ru/OPC and some other catalysts reported in recent literatures (1 M KOH).

| Catalysts      | Overpotential                     | Tafel Slope (mV dec <sup>-1</sup> ) | Ref.                                                |
|----------------|-----------------------------------|-------------------------------------|-----------------------------------------------------|
| Ru/OPC         | 3 mV at 10 mA cm <sup>-2</sup>    | 49                                  | In this work                                        |
| Ru-CoP/NC      | 22 mV at 10 mA cm <sup>-2</sup>   | 50                                  | ACS Appl. Mater. Interfaces, 2021, 13, 56035–56044. |
| Ru/C           | 39 mV at 10 mA cm <sup>-2</sup>   | /                                   | ACS Appl. Energy Mater., 2021, 4, 4284–4289.        |
| CoRu-O/A@HNC-2 | 85 mV at 10 mA cm <sup>-2</sup>   | 72.5                                | ACS Appl. Mater. Interfaces, 2020, 12, 51437–51447. |
| Ru@NC          | 39 mV at 10 mA cm <sup>-2</sup>   | 37.9                                | ACS Sustainable Chem. Eng., 2022, 10, 15530–15537.  |
| ld-Ru@a-Co/Ti  | 33.5 mV at 10 mA cm <sup>-2</sup> | 39.6                                | Chem. Commun., 2022, 58, 13588–13591.               |
| Ni2P–Ru/NF     | 40 mV at 10 mA cm <sup>-2</sup>   | 33.9                                | Sustainable Energy Fuels, 2023, 7, 2830–2840.       |
| Ru/Mo2C@NC     | 13 mV at 10 mA cm <sup>-2</sup>   | 33.2                                | J. Mater. Chem. A, 2021, 9, 20518–20529.            |
| Ru/PEI-XC      | 13 mV at 10 mA cm <sup>-2</sup>   | 79.3                                | J. Mater. Chem. A, 2021, 9, 22934–22942.            |
| MoRu/C         | 27.1 mV at 5 mA cm <sup>-2</sup>  | 51                                  | Chem. Commun., 2020, 56, 14475–14478.               |
| D/NFF-Ru-Zn    | 90 mV at 100 mA cm <sup>-2</sup>  | 41                                  | J. Mater. Chem. A, 2022, 10, 20453–20463.           |
| CF@Ru-CoCH NWs | 121 mV at 100 mA cm <sup>-2</sup> | 65                                  | Electrochim. Acta, 2020, 331, 135367                |
| Ru/TiOxNy NBs  | 16 mV at 10 mA cm <sup>-2</sup>   | 42                                  | J. Mater. Chem. A, 2022, 10, 11205–11212.           |
| RuCr@C         | 19 mV at 10 mA cm <sup>-2</sup>   | 24                                  | Adv. Funct. Mater., 2021, 32, 2108991.              |
| Ru MNSs        | 24 mV at 10 mA cm <sup>-2</sup>   | 33                                  | Angew. Chem. Int.                                   |

|               |                                   |      |                                    |
|---------------|-----------------------------------|------|------------------------------------|
|               |                                   |      | Ed. Engl., 2022, e202116867.       |
| P-Ru-CoNi-LDH | 29 mV at 10 mA cm <sup>-2</sup>   | 69   | Small, 2022, 18, e2104323.         |
| CC@WS2/Ru-450 | 32.1 mV at 10 mA cm <sup>-2</sup> | 53.2 | Adv. Funct. Mater., 2022, 2109439. |
| Ru-HMT-MP-7   | 33 mV at 10 mA cm <sup>-2</sup>   | 26.4 | Small, 2022, e2105168.             |
| Ni5P4-Ru      | 155 mV at 10 mA cm <sup>-2</sup>  | 92   | Adv. Mater., 2020, 32, e1906972.   |
| Ru-NiCo2S     | 32 mV at 10 mA cm <sup>-2</sup>   | 41.3 | Adv. Funct. Mater., 2021, 2109731. |
| RuRh-Co       | 32 mV at 10 mA cm <sup>-2</sup>   | 31   | Nano Energy, 2021, 90, 106579.     |
